# Supplementary figures and images for: Phosphorylation acts positively and negatively to regulate MRTF-A subcellular localisation and activity
Source: eLife journal article supplement (doi:10.7554/elife.15460), 2016-06-15

**A**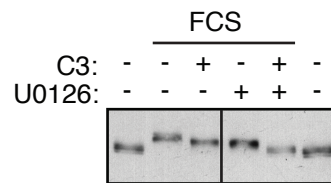**B**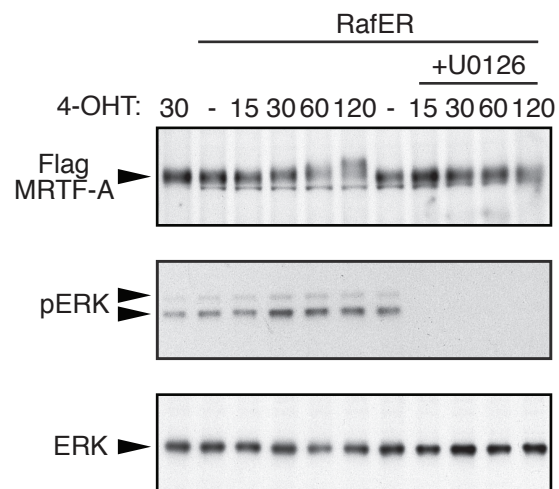**C**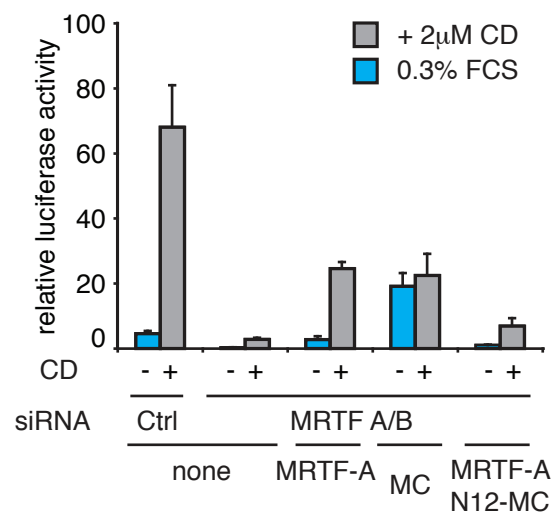**D**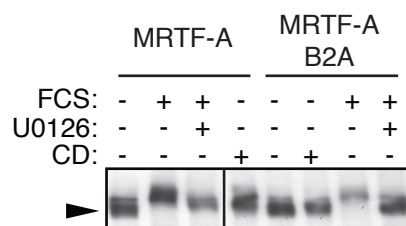

Supplement: supp [file elife_poa_e15460_Figure_1_figure_supplement_1.pdf › elife_poa_e15460_Figure_1_figure_supplement_1.pdf]

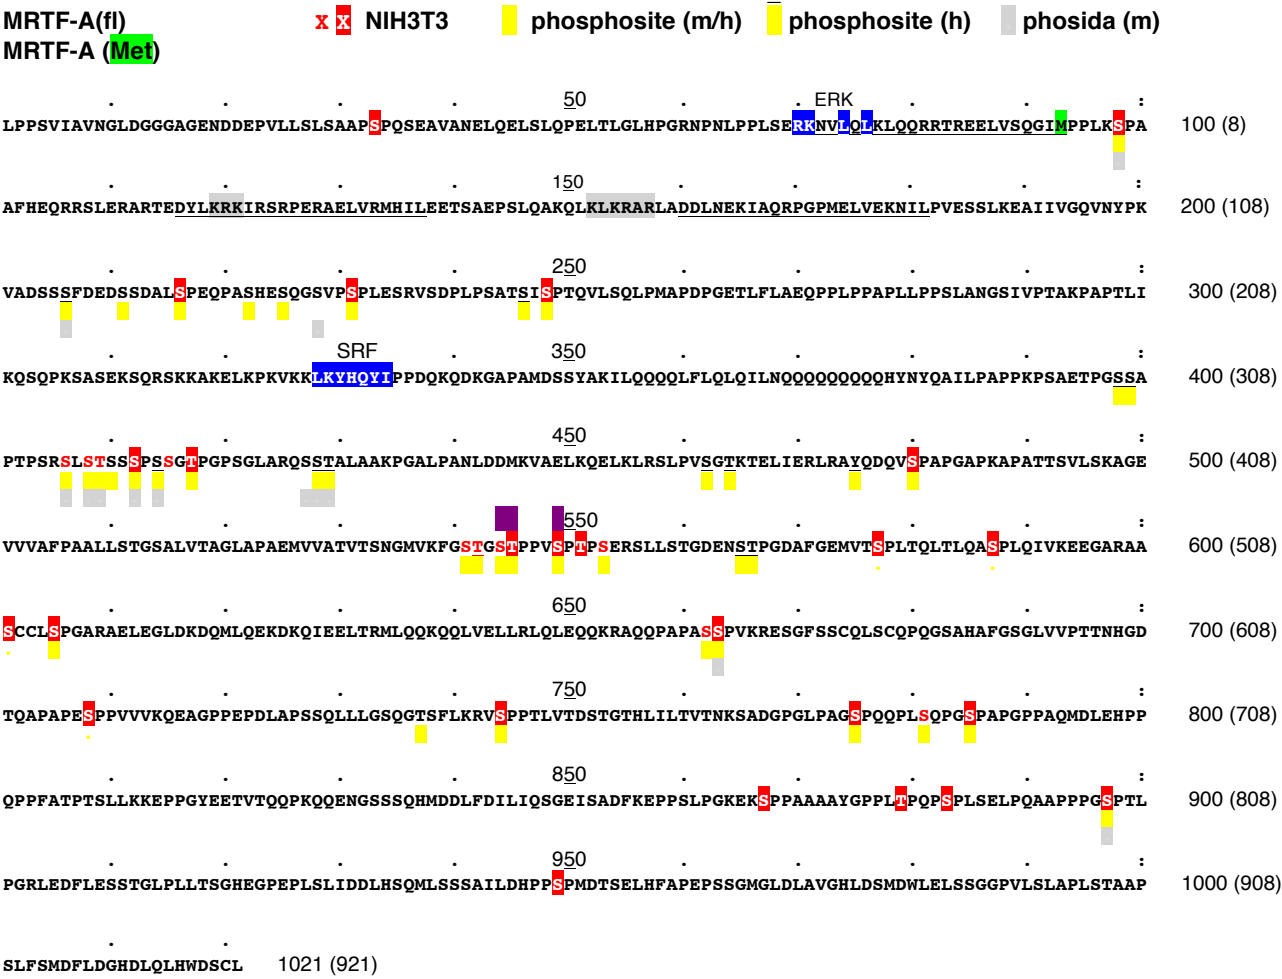

Figure 2, Supplement 1

Supplement: supp [file elife_poa_e15460_Figure_2_figure_supplement_1.pdf › elife_poa_e15460_Figure_2_figure_supplement_1.pdf]

**A**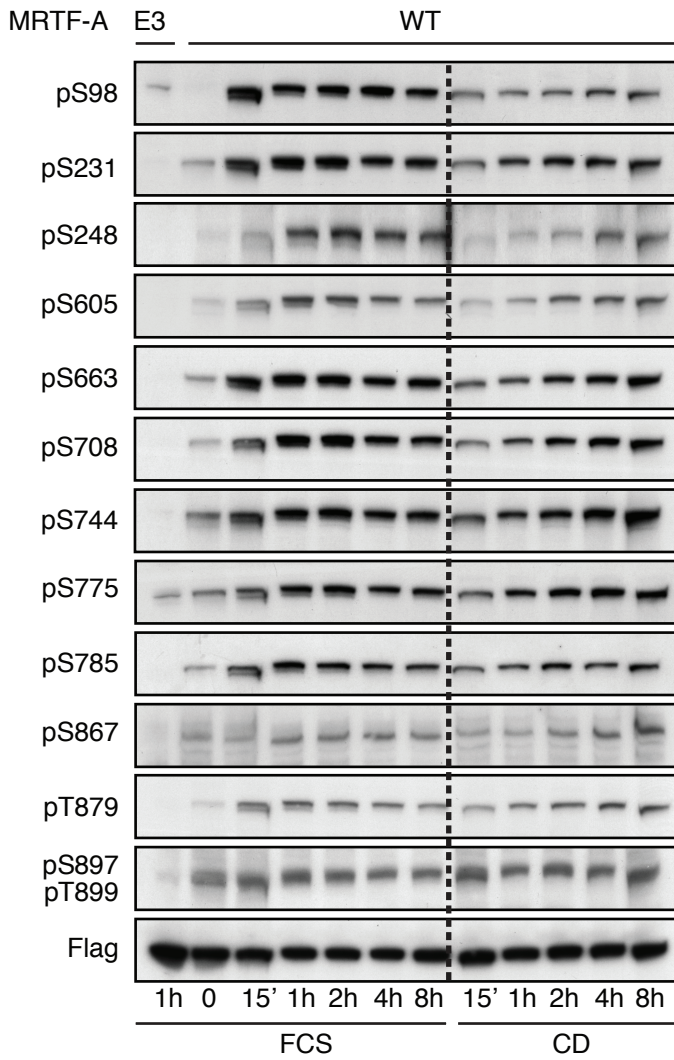**B**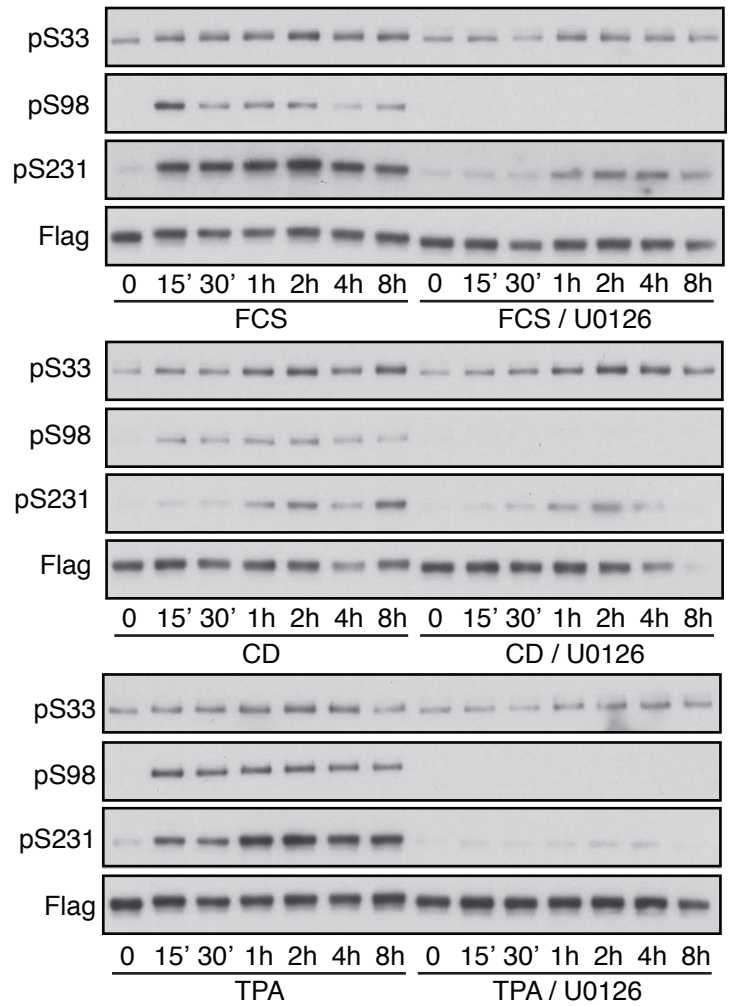**C**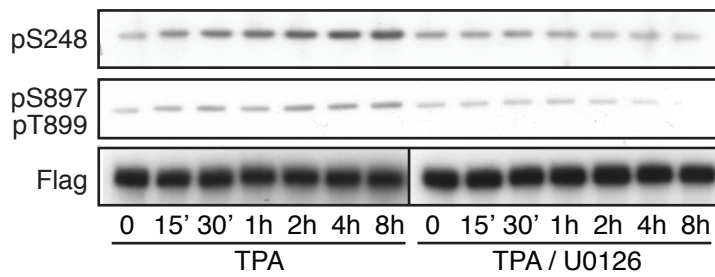**D**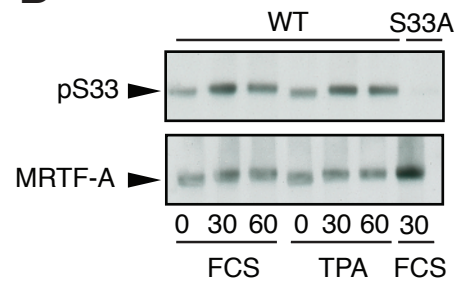

Figure 2, Supplement 2

Supplement: supp [file elife_poa_e15460_Figure_2_figure_supplement_2.pdf › elife_poa_e15460_Figure_2_figure_supplement_2.pdf]

**A**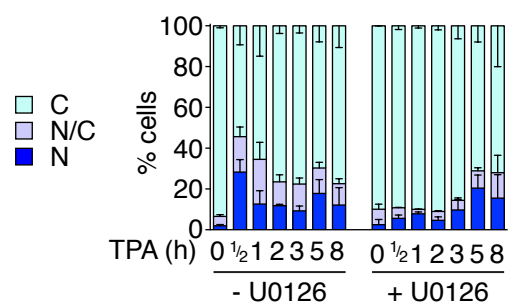**B**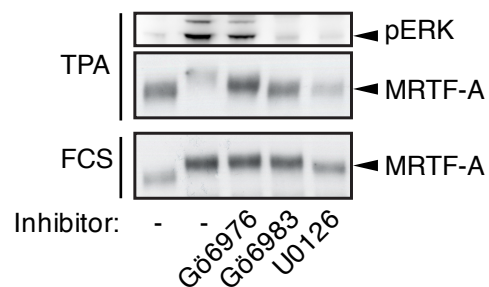**C**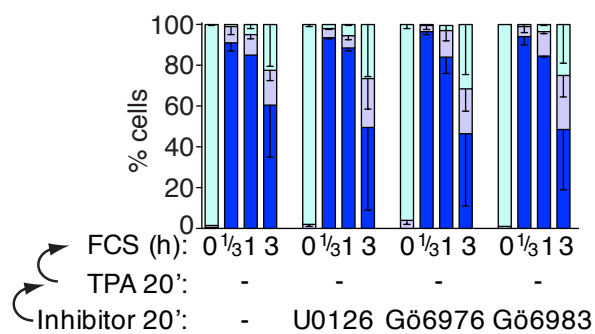**D**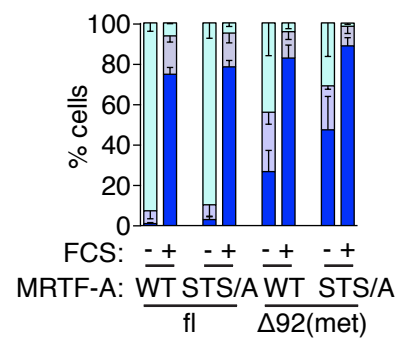**E**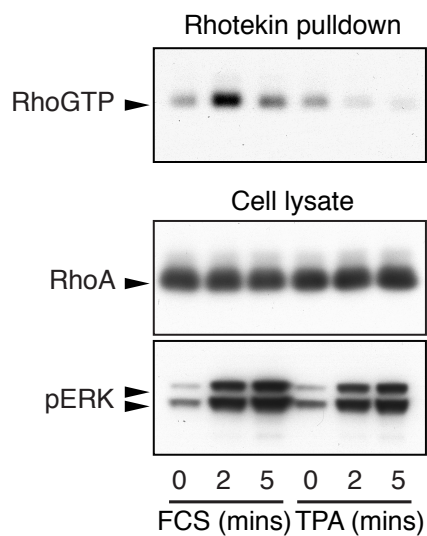

Figure 3, Supplement 1

Supplement: supp [file elife_poa_e15460_Figure_3_figure_supplement_1.pdf › elife_poa_e15460_Figure_3_figure_supplement_1.pdf]

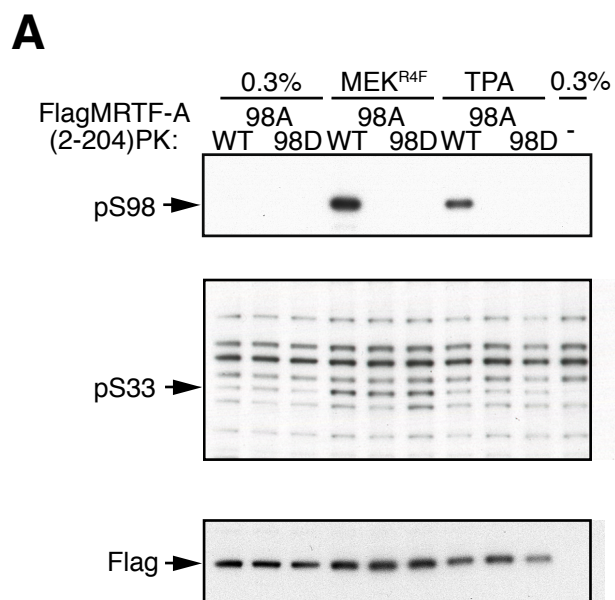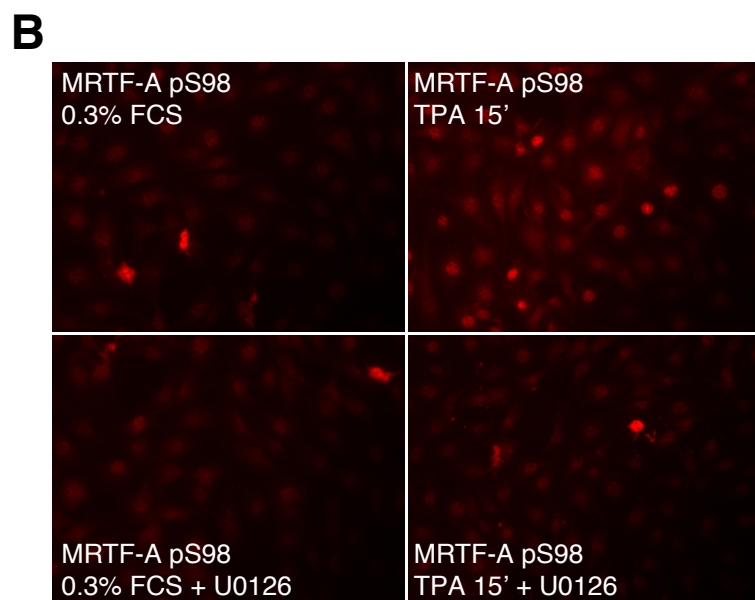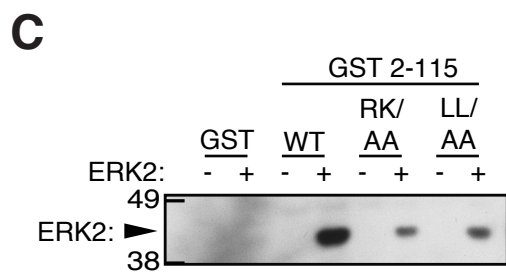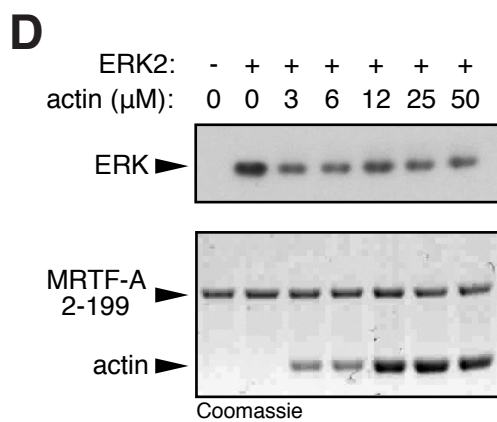

Figure 4, Supplement 1

Supplement: supp [file elife_poa_e15460_Figure_4_figure_supplement_1.pdf › elife_poa_e15460_Figure_4_figure_supplement_1.pdf]

**A**

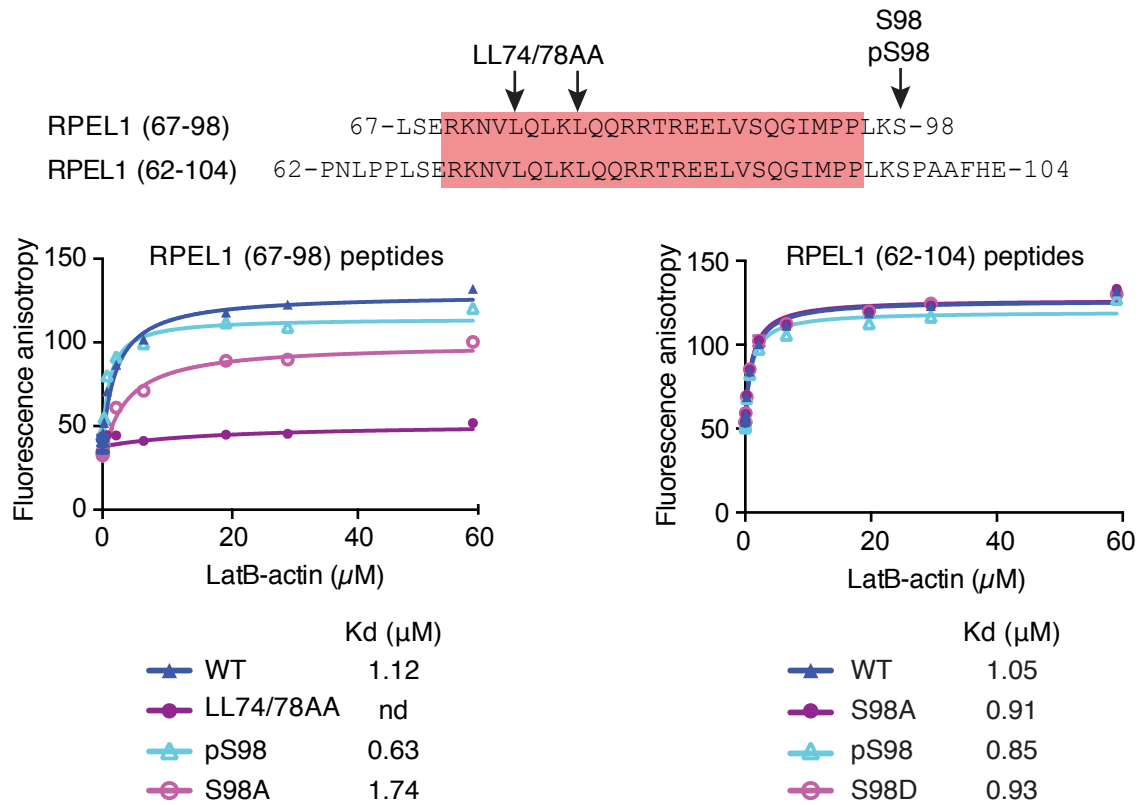

**B**

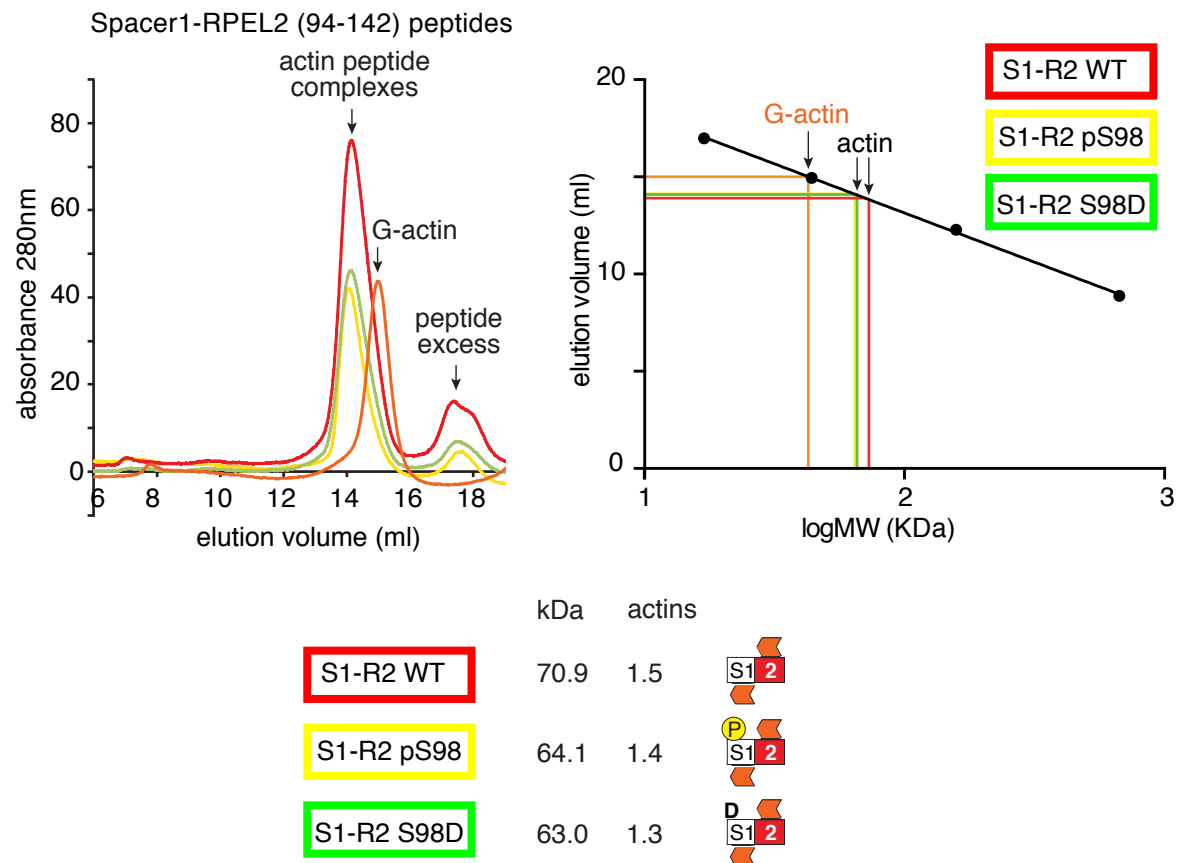

Figure 4, Supplement 2

Supplement: supp [file elife_poa_e15460_Figure_4_figure_supplement_2.pdf › elife_poa_e15460_Figure_4_figure_supplement_2.pdf]

**A**

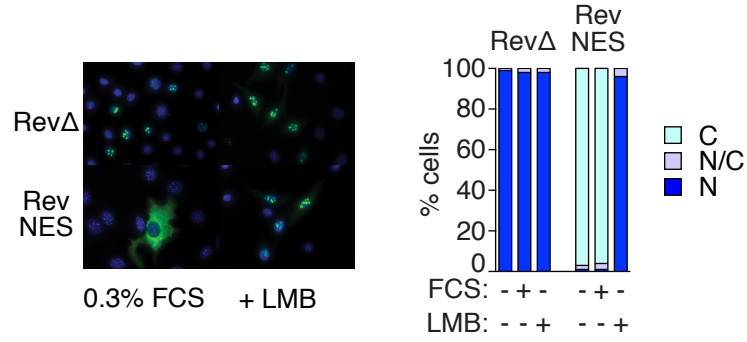

**B**

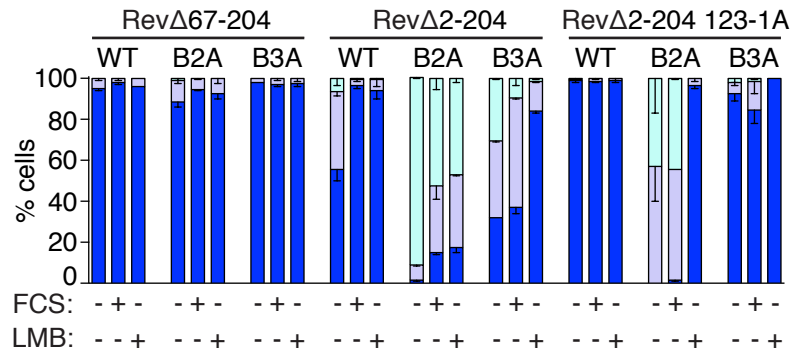

**C**

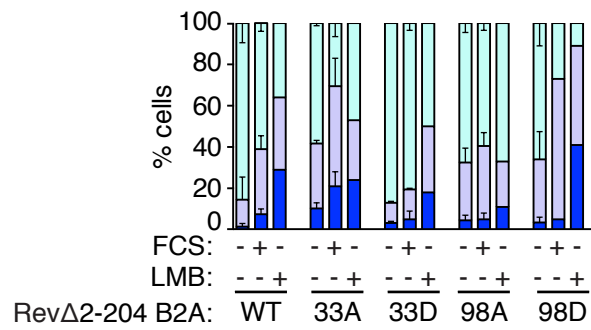

Supplement: supp [file elife_poa_e15460_Figure_5_figure_supplement_1.pdf › elife_poa_e15460_Figure_5_figure_supplement_1.pdf]

A

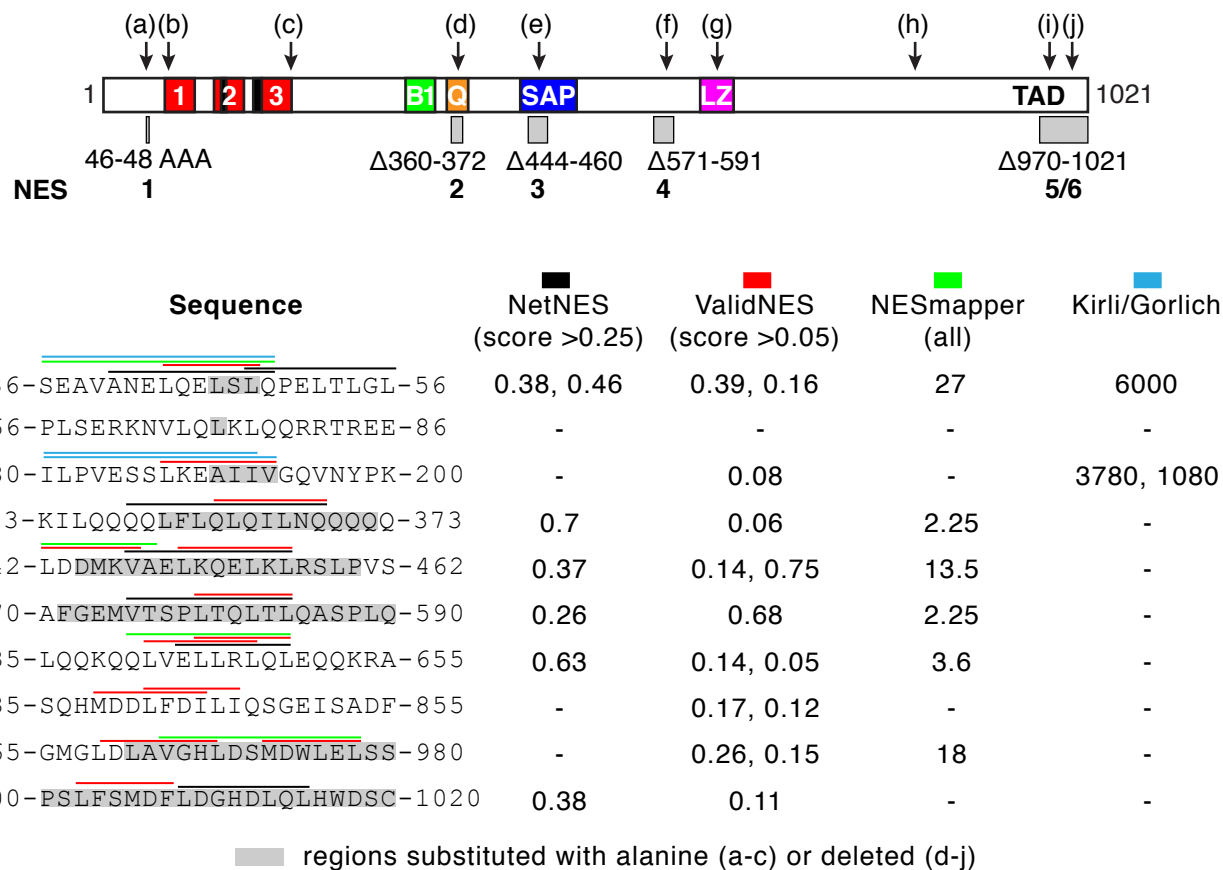

B

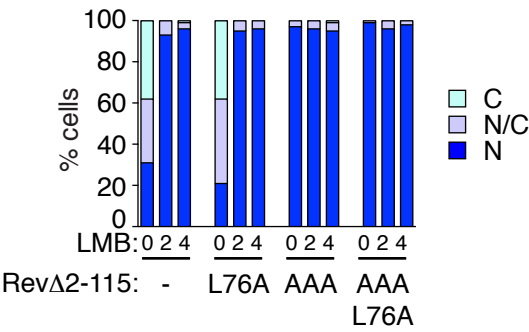

C

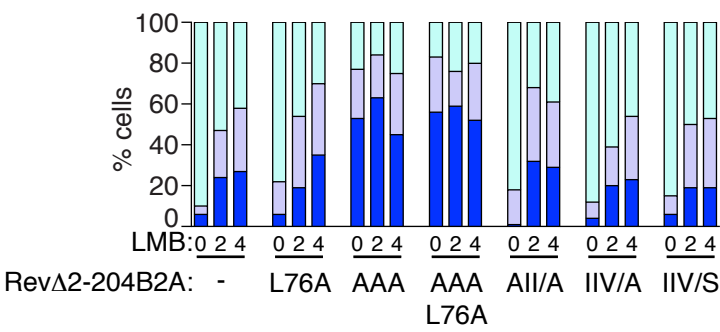

Figure 7, Supplement 1

Supplement: supp [file elife_poa_e15460_Figure_7_figure_supplement_1.pdf › elife_poa_e15460_Figure_7_figure_supplement_1.pdf]
